# Supplementary material for: Progression-Free Survival and Overall Survival in Patients with Advanced HER2-Positive Breast Cancer Treated with Trastuzumab Emtansine (T-DM1) after Previous Treatment with Pertuzumab
Source: PubMed Central journal article supplement (PMC7603111; doi:10.3390/cancers12103021), 2020-10-17
Supplement: cancers-12-03021-s001.pdf [file cancers-12-03021-s001.pdf]

**Supplementary Table 1.** Data categories recorded in the PRAEGNANT study.

| <b>Data Continuously Captured, if Applicable</b> | <b>Data Assessed at Study Entry</b>     | <b>Data Assessed at Follow-Up Care Appointments</b> |
|--------------------------------------------------|-----------------------------------------|-----------------------------------------------------|
| Concomitant diseases                             | Life status, ECOG                       | Life status, ECOG                                   |
| Concomitant medication                           | Quality of life                         | Quality of life                                     |
| Cancer systemic therapies                        | Breast cancer risk factor questionnaire | Breast and axilla evaluation                        |
| Cancer radiotherapy                              | Breast and axilla evaluation            | Distant metastasis evaluation                       |
| Cancer surgery                                   | Distant metastasis evaluation           | Biomaterial ascertainment                           |
| Breast cancer, right side                        | Biomaterial ascertainment               | PRO questionnaires                                  |
| Breast cancer, left side                         | PRO questionnaires                      |                                                     |

ECOG, Eastern Cooperative Oncology Group (performance status); PRO, patient-reported outcome
